# Supplementary material
Source: Springer Nature journal article supplement (https://www.springermedizin.de/resource/supplementary/12937_2012_602_MOESM1_ESM.pdf/25653756)

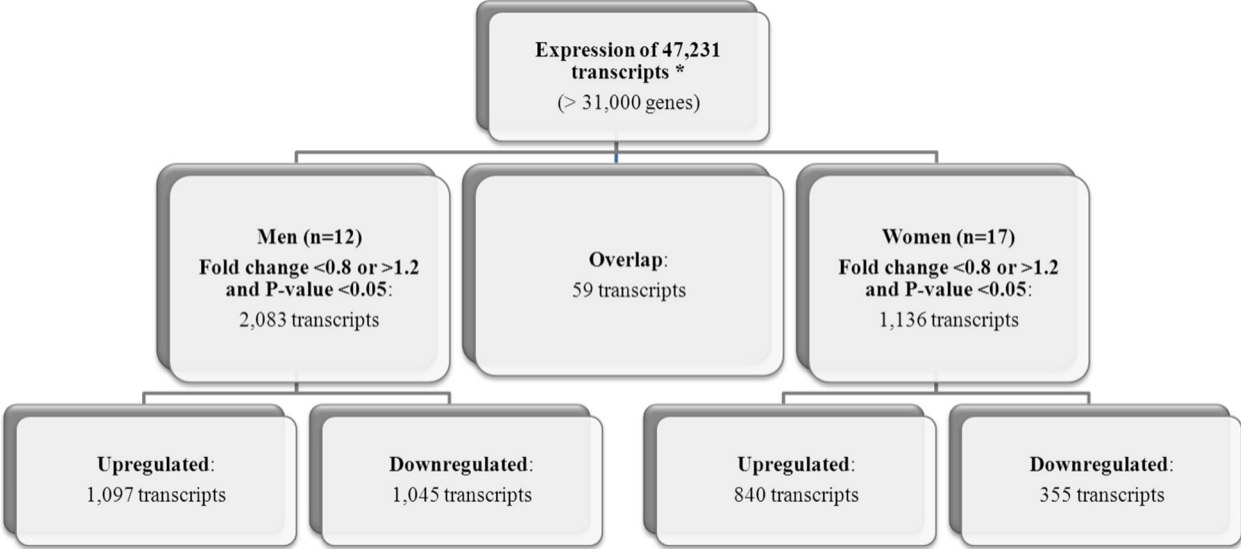

\*HumanHT12v4 Expression BeadChips

Supplement: MOESM1 [file 25653756]
